# Supplementary material for: Synthesis and Biological Evaluation of Novel Amino and Amido Substituted Pentacyclic Benzimidazole Derivatives as Antiproliferative Agents
Source: Preprints.org preprint supplement (doi:10.20944/preprints202401.1031.v1), 2024-01-12
Supplement: Supplementary file 1 [file supplementary]

Supporting information

**Synthesis and biological evaluation of novel amino and amido substituted pentacyclic benzimidazole derivatives**

Nataša Perin1,Marjana Gulin1, Marija Kos1, Leentje Persoons2, Dirk Daelmans2, Ivana Fabijanić3, Marijana Radić Stojković3,* and Marijana Hranjec 1,*

1 Department of Organic Chemistry, Faculty of Chemical Engineering and Technology, University of Zagreb, Marulićev trg 20, HR-10000 Zagreb, Croatia;

2 KU Leuven, Department of Microbiology and Immunology, Laboratory of Virology and Chemotherapy, Rega Institute, Leuven, Belgium; 3 Ruđer Bošković Institute, Division of Organic Chemistry and Biochemistry, Bijenička cesta 54, HR-10000 Zagreb, Croatia*;*

**Contents**

1. Spectroscopic characterization of pentacyclic benzimidazoles in aqueous solutions.

2. Interactions of pentacyclic benzimidazoles with ds-polynucleotides in neutral medium (pH=7.0)

2.1. Fluorimetric titrations

2.2. Thermal melting experiments

2.3. Circular dichroism (CD) titrations

3. NMR spectra of synthesized compounds (S18-S59)

**1. Spectroscopic characterization of pentacyclic benzimidazoles in aqueous solutions**

**Figure S1**. UV/Vis spectra changes of **22** at different concentrations (concentration range from 5.0 × 10-6 to 2.0 × 10-5 mol dm-3) at pH=7.0, sodium cacodylate buffer, *I*=0.05 M.

**Figure S2**. UV/Vis spectra changes of **19** at different concentrations (concentration range from 5.0 × 10-6 to 1.99 × 10-5 mol dm-3) at pH=7.0, sodium cacodylate buffer, *I*=0.05 M.

**Figure S3**. UV/Vis spectra changes of **9** at different concentrations (concentration range from 5.0 × 10-6 to 1.99 × 10-5 mol dm-3) at pH=7.0, sodium cacodylate buffer, *I*=0.05 M.

**Figure S4**. UV/Vis spectra changes of **6** at different concentrations (concentration range from 5.0 × 10-6 to 1.99 × 10-5 mol dm-3) at pH=7.0, sodium cacodylate buffer, *I*=0.05 M.

**Table S1.** Electronic absorption data of **6, 9, 19** and **22**.

|  | pH = 7.0a | |
| --- | --- | --- |
| λmax  / nm | ε × 103 / mmol-1 cm2 |
| **6** | 253 | 33.25 |
| 265 | 30.30 |
| 390 | 6.48 |
| **9** | 266 | 30.93 |
| 406 | 12.46 |
| **19** | 271 | 26.04 |
| 447 | 17.77 |
| **22** | 268 | 21.48 |
| 436 | 13.13 |

a Sodium cacodylate buffer, *I* = 0.05 mol dm-3,pH = 7.0.

The emission intensities of buffered aqueous solutions (sodium cacodylate buffer, *I* = 0.05 mol dm-3,pH = 7.0) of studied compounds were proportional to their concentrations up to *c* = 2.0 × 10-6 mol dm-3 (Figures S5-S8).

**Figure S5**. Emission and excitation spectra changes of **22** at different concentrations at λexc=436 nm (concentration range from 5.0 × 10-7 to 2.0 × 10-6 mol dm-3) at pH=7.0, Na cacodylate buffer, *I*=0.05 mol dm-3.

**Figure S6**. Emission and excitation spectra changes of **19** at different concentrations at λexc=447 nm (concentration range from 5.0 × 10-7 to 2.0 × 10-6 mol dm-3) at pH=7.0, Na cacodylate buffer, *I*=0.05 mol dm-3.

**Figure S7**. Emission and excitation spectra changes of **9** at different concentrations at λexc=406 nm (concentration range from 5.0 × 10-7 to 2.0 × 10-6 mol dm-3) at pH=7.0, Na cacodylate buffer, *I*=0.05 mol dm-3.

**Figure S8**. Emission and excitation spectra changes of **6** at different concentrations at λexc=392 nm (concentration range from 5.0 × 10-7 to 2.0 × 10-6 mol dm-3 ) at pH=7.0, Na cacodylate buffer, *I*=0.05 mol dm-3.

**2. Interactions of pentacyclic benzimidazoles with ds-polynucleotides in neutral medium (pH=7.0)**

*2.1. Fluorimetric titrations*

**Figure S9**. a) Changes in fluorescence spectrum of **22** (*c*= 1.0 × 10-6 mol dm-3, λexc=436 nm) upon titration with ctDNA (*c*= 5.0 × 10-7 – 8.0 × 10-6 mol dm-3); b) Dependence of **22** absorbance at λmax = 537 nm on c(ctDNA), at pH=7.0, sodium cacodylate buffer, *I* = 0.05 mol dm-3.

**Figure S10**. a) Changes in fluorescence spectrum of **19** (*c*= 1.0 × 10-6 mol dm-3, λexc=447 nm) upon titration with ctDNA (*c*= 5.0 × 10-7 – 6.5 × 10-6 mol dm-3); b) Dependence of **19** absorbance at λmax = 531 nm on c(ctDNA), at pH=7.0, sodium cacodylate buffer, *I* = 0.05 mol dm-3.

**Figure S11.** a) Changes in fluorescence spectrum of **9** (*c*= 1.0 × 10-6 mol dm-3, λexc=406 nm) upon titration with ctDNA (*c*= 5.0 × 10-7 – 4.0 × 10-6 mol dm-3); b) Dependence of **9** absorbance at λmax = 540 nm on c(ctDNA), at pH=7.0, sodium cacodylate buffer, *I* = 0.05 mol dm-3.

**Figure S12. a)** Changes in fluorescence spectrum of **6** (*c*= 1.0 × 10-6 mol dm-3, λexc=392 nm) upon titration with ctDNA (*c*= 5.0 × 10-7 – 4.0 × 10-6 mol dm-3); b) Dependence of **6** absorbance at λmax = 531 nm on c(ctDNA), at pH=7.0, sodium cacodylate buffer, *I* = 0.05 mol dm-3.

**Figure S13**. a) Changes in fluorescence spectrum of **22** (*c*= 5.0 × 10-7 mol dm-3, λexc=436 nm) upon titration with rArU (*c*= 2.0 × 10-7 – 2.0 × 10-6 mol dm-3); b) Dependence of **22** absorbance at λmax = 536 nm on c(rArU), at pH=7.0, sodium cacodylate buffer, *I* = 0.05 mol dm-3.

**Figure S14**. a) Changes in fluorescence spectrum of **19** (*c*= 5.0 × 10-7 mol dm-3, λexc=447 nm) upon titration with rArU (*c*= 1.0 × 10-7 – 1.5 × 10-6 mol dm-3); b) Dependence of **19** absorbance at λmax = 529 nm on c(rArU), at pH=7.0, sodium cacodylate buffer, *I* = 0.05 mol dm-3.

*2.2. Thermal melting experiments*

**Figure S15.** Melting curve of **ctDNA** upon addition ofratio, ***r*** ([compound/ [polynucleotide])=0.1of **6, 9, 19** and **22** at pH = 7.0 (buffer sodium cacodylate, *I* = 0.05 mol dm-3).

**Figure S16.** Melting curve of **rArU** upon addition ofratio, ***r*** ([compound/ [polynucleotide]) = 0.1of **19** and **22** at pH = 7.0 (buffer sodium cacodylate, *I* = 0.05 mol dm-3).

*2.3. Circular dichroism (CD) titrations*

|  | **22** | **19** | **9** | **6** |
| --- | --- | --- | --- | --- |
| **ct DNA** |  |  |  |  |
| **rArU** |  |  |  |  |

**Figure S17.** CD titration of ctDNA and rArU (c = 3.0 × 10-5 mol dm-3) with **6, 9, 19** and **22** at molar ratios **r** = [compound]/ [polynucleotide] (pH = 7.0, buffer sodium cacodylate, I = 0.05 mol dm-3).

**3. NMR spectra of synthesized compounds**

**Figure S18.** 1H NMR spectrum (DMSO-*d6*, 300 MHz) of *7-oxo-5,7-dihydrobenzo[g]benzo[4,5]imidazo[1,2-a][1,8]naphthyridine-6-carbonitrile* ***4***

**Figure S19.** 1H NMR spectrum (DMSO-*d6*, 300 MHz) of *7-chlorobenzo[g]benzo[4,5]imidazo[1,2-a][1,8]naphthyridine-6-carbonitrile* ***5***

**Figure S20.** 13C NMR spectrum (DMSO-*d6*, 100 MHz) of *7-chlorobenzo[g]benzo[4,5]imidazo[1,2-a][1,8]naphthyridine-6-carbonitrile* ***5***

**Figure S21.** 1H NMR spectrum (DMSO-*d6*, 300 MHz) of *7-((3-N,N-(dimethylamino)propyl)amino)benzo[g]benzo[4,5]imidazo[1,2-a][1,8]naphthyridine-6-carbonitrile* ***6***

**Figure S22.** 13C NMR spectrum (DMSO-*d6*, 75 MHz) of *7-((3-N,N-(dimethylamino)propyl)amino)benzo[g]benzo[4,5]imidazo[1,2-a][1,8]naphthyridine-6-carbonitrile* ***6***

**
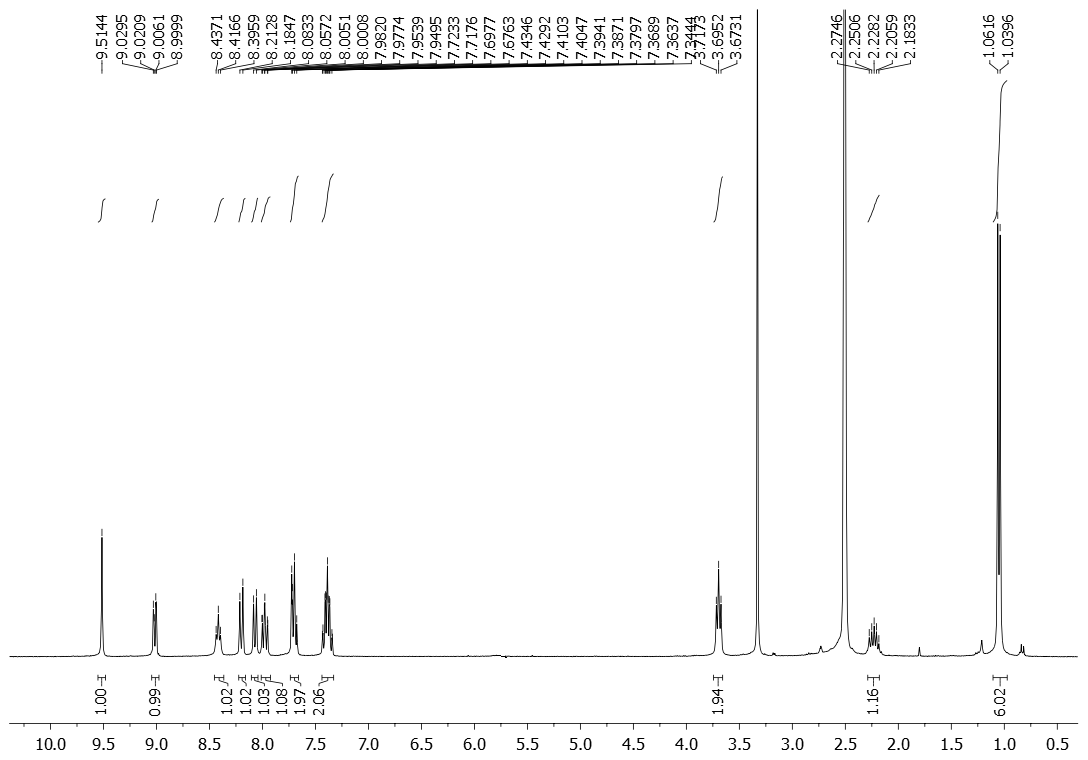
**

**Figure S23.** 1H NMR spectrum (DMSO-*d6*, 300 MHz) of *7-(N-isobutylamino)benzo[g]benzo[4,5]imidazo[1,2-a][1,8]naphthyridine-6-carbonitrile* ***7***

**Figure S24.** 13C NMR spectrum (DMSO-*d6*, 75 MHz) of *7-(N-isobutylamino)benzo[g]benzo[4,5]imidazo[1,2-a][1,8]naphthyridine-6-carbonitrile* ***7***

**
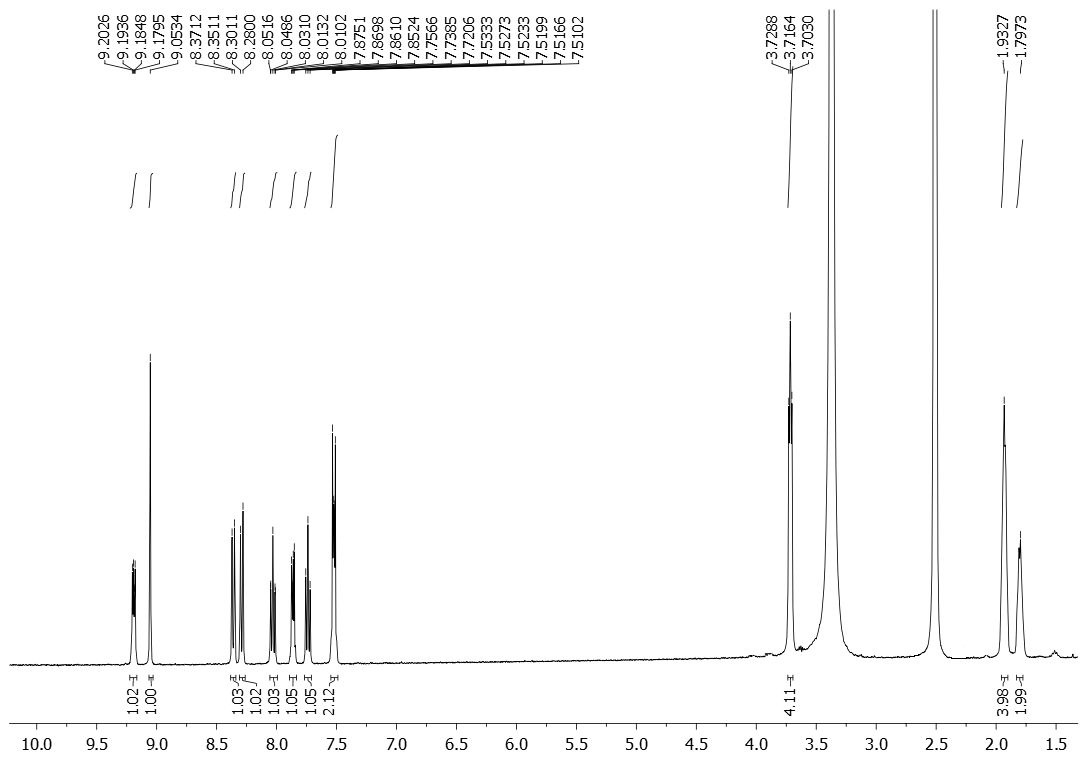
**

**Figure S25.** 1H NMR spectrum (DMSO-*d6*, 300 MHz) of *7-(piperidin-1-yl)benzo[g]benzo[4,5]imidazo[1,2-a][1,8]naphthyridine-6-carbonitrile* ***8***

***
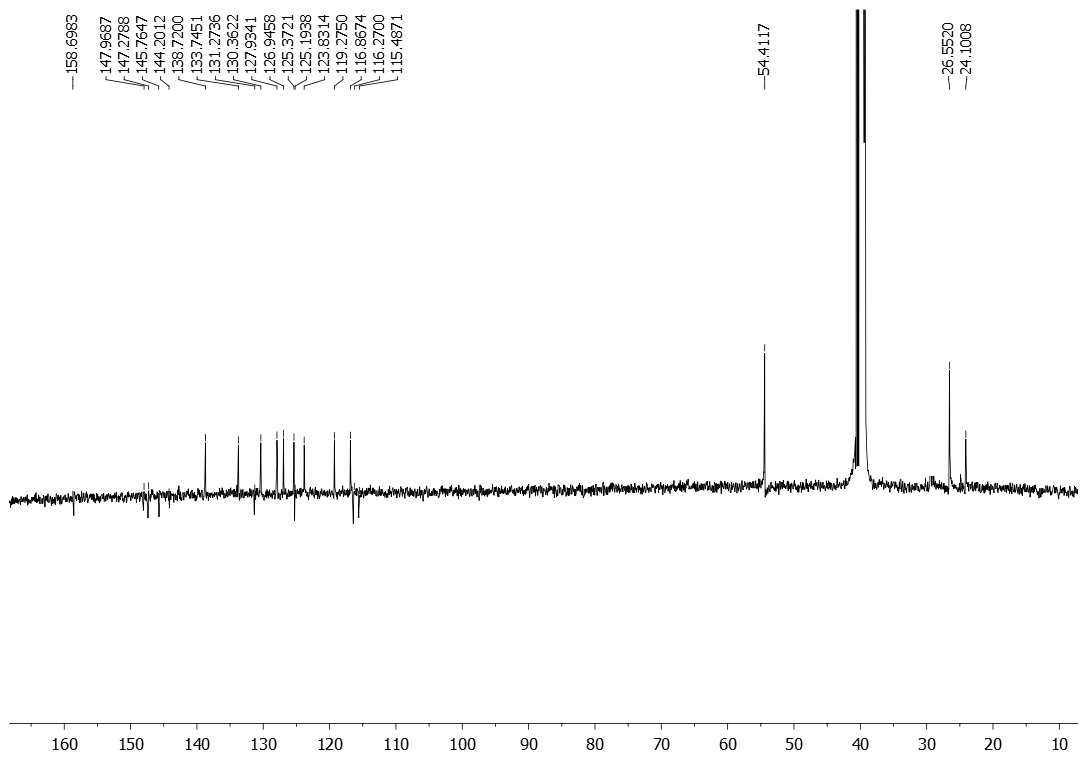
***

**Figure S26.** 13C NMR spectrum (DMSO-*d6*, 75 MHz) of *7-(piperidin-1-yl)benzo[g]benzo[4,5]imidazo[1,2-a][1,8]naphthyridine-6-carbonitrile* ***8***

**Figure S27.** 1H NMR spectrum (DMSO-*d6*, 300 MHz) of *7-(piperazin-1-yl)benzo[g]benzo[4,5]imidazo[1,2-a][1,8]naphthyridine-6-carbonitrile* ***9***

**Figure S28.** 13C NMR spectrum (DMSO-*d6*, 75 MHz) of *7-(piperazin-1-yl)benzo[g]benzo[4,5]imidazo[1,2-a][1,8]naphthyridine-6-carbonitrile* ***9***

**
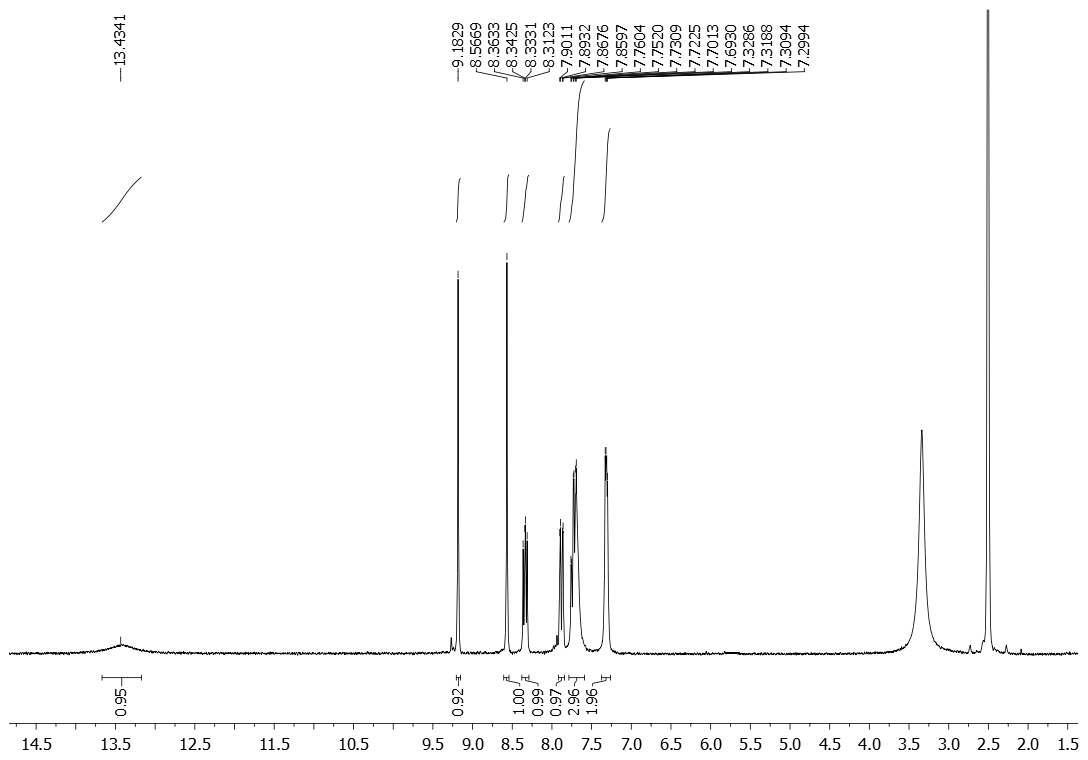
**

**Figure S29.** 1H NMR spectrum (DMSO-*d6*, 300 MHz) of *(E)-2-(1H-benzo[d]imidazol-2-yl)-3-(2-chloro-7-fluoroquinolin-3-yl)acrylonitrile* ***13***

**Figure S30.** 13C NMR spectrum (DMSO-*d6*, 75 MHz) of *(E)-2-(1H-benzo[d]imidazol-2-yl)-3-(2-chloro-7-fluoroquinolin-3-yl)acrylonitrile* ***13***

**Figure S31.** 1H NMR spectrum (DMSO-*d6*, 300 MHz) of *11-fluorobenzo[g]benzo[4,5]imidazo[1,2-a][1,8]naphthyridine-6-carbonitrile* ***16***

**Figure S32.** 13C NMR spectrum (DMSO-*d6*, 75 MHz) of *11-fluorobenzo[g]benzo[4,5]imidazo[1,2-a][1,8]naphthyridine-6-carbonitrile* ***16***

**Figure S33.** 1H NMR spectrum (DMSO-*d6*, 300 MHz) of *11-((3-N,N-(dimethylamino)propyl)amino)benzo[g]benzo[4,5]imidazo[1,2-a][1,8]naphthyridine-6-carbonitrile* ***19***

**Figure S34.** 13C NMR spectrum (DMSO-*d6*, 150 MHz) of *11-((3-N,N-(dimethylamino)propyl)amino)benzo[g]benzo[4,5]imidazo[1,2-a][1,8]naphthyridine-6-carbonitrile* ***19***

**
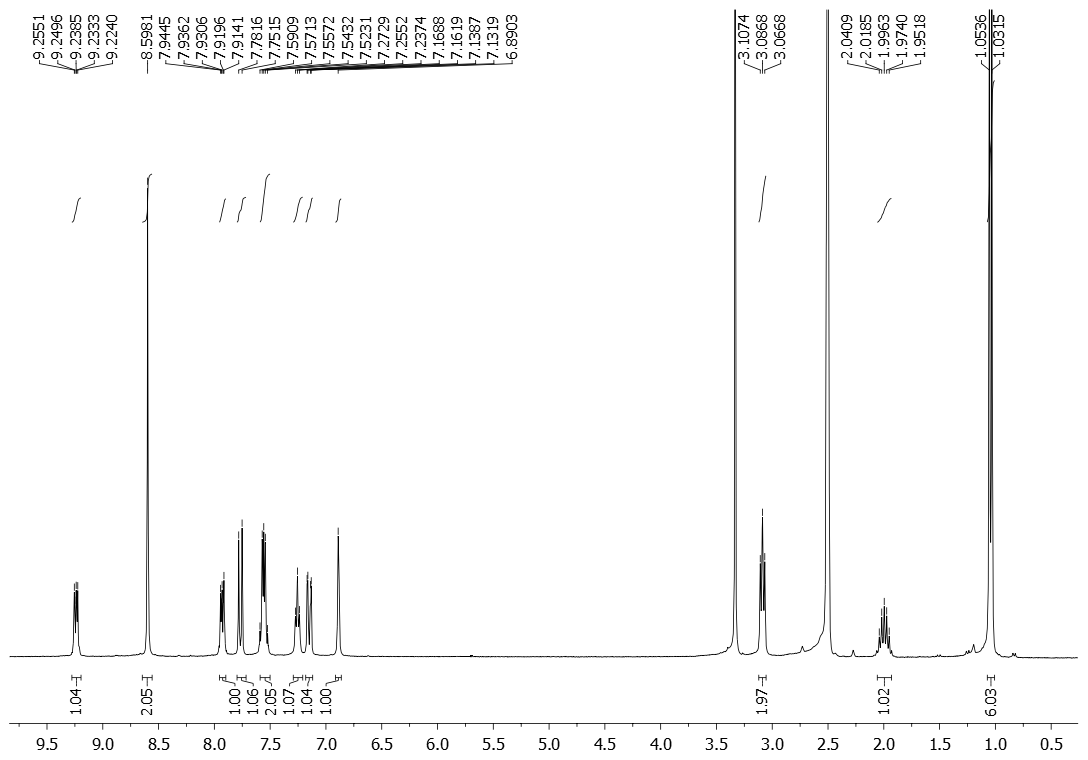
**

**Figure S35.** 1H NMR spectrum (DMSO-*d6*, 300 MHz) of *11-(N-isobutylamino)benzo[g]benzo[4,5]imidazo[1,2-a][1,8]naphthyridine-6-carbonitrile* ***20***

**Figure S36.** 13C NMR spectrum (DMSO-*d6*, 75 MHz) of *11-(N-isobutylamino)benzo[g]benzo[4,5]imidazo[1,2-a][1,8]naphthyridine-6-carbonitrile* ***20***

**
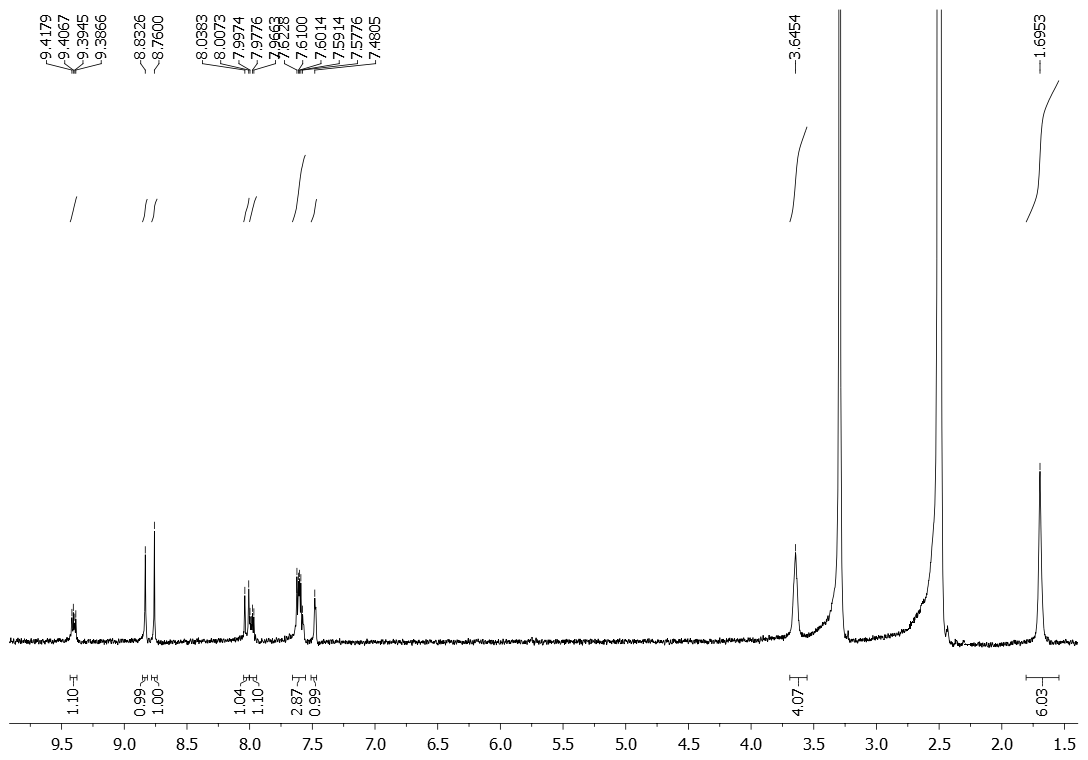
**

**Figure S37.** 1H NMR spectrum (DMSO-*d6*, 300 MHz) of *11-(piperidin-1-yl)benzo[g]benzo[4,5]imidazo[1,2-a][1,8]naphthyridine-6-carbonitrile* ***21***

**Figure S38.** 13C NMR spectrum (DMSO-*d6*, 75 MHz) of *11-(piperidin-1-yl)benzo[g]benzo[4,5]imidazo[1,2-a][1,8]naphthyridine-6-carbonitrile* ***21***

**Figure S39.** 1H NMR spectrum (DMSO-*d6*, 300 MHz) of *11-(piperazin-1-yl)benzo[g]benzo[4,5]imidazo[1,2-a][1,8]naphthyridine-6-carbonitrile* ***22***

**Figure S40.** 13C NMR spectrum (DMSO-*d6*, 75 MHz) of *11-(piperazin-1-yl)benzo[g]benzo[4,5]imidazo[1,2-a][1,8]naphthyridine-6-carbonitrile* ***22***

**Figure S41.** 1H NMR spectrum (DMSO-*d6*, 600 MHz) of *(E)-2-(1H-benzo[d]imidazol-2-yl)-3-(2-chloroquinolin-3-yl)acrylonitrile* ***14***

**Figure S42.** 13C NMR spectrum (DMSO-*d6*, 150 MHz) of *(E)-2-(1H-benzo[d]imidazol-2-yl)-3-(2-chloroquinolin-3-yl)acrylonitrile* ***14***

**Figure S43.** 1H NMR spectrum (DMSO-*d6*, 600 MHz) of *(E)-2-(1H-benzo[d]imidazol-2-yl)-3-(quinolin-3-yl)acrylonitrile* ***15***

**Figure S44.** 13C NMR spectrum (DMSO-*d6*, 75 MHz) of *(E)-2-(1H-benzo[d]imidazol-2-yl)-3-(quinolin-3-yl)acrylonitrile* ***15***

**Figure S45.** 1H NMR spectrum (DMSO-*d6*, 600 MHz) of *benzo[g]benzo[4,5]imidazo[1,2-a][1,8]naphthyridine-6-carbonitrile* ***17***

**Figure S46.** 13C NMR spectrum (DMSO-*d6*, 75 MHz) of *benzo[g]benzo[4,5]imidazo[1,2-a][1,8]naphthyridine-6-carbonitrile* ***17***

**Figure S47.** 1H NMR spectrum (DMSO-*d6*, 600 MHz) of *benzo[g]benzo[4,5]imidazo[1,2-a][1,5]naphthyridine-7-carbonitrile* ***18***

**Figure S48.** 13C NMR spectrum (DMSO-*d6*, 150 MHz) of *benzo[g]benzo[4,5]imidazo[1,2-a][1,5]naphthyridine-7-carbonitrile* ***18***

**Figure S49.** 1H NMR spectrum (DMSO-*d6*, 300 MHz) of *benzo[g]benzo[4,5]imidazo[1,2-a][1,8]naphthyridine-6-carboxylic acid* ***23***

**Figure S50.** 1H NMR spectrum (DMSO-*d6*, 400 MHz) of *benzo[g]benzo[4,5]imidazo[1,2-a][1,5]naphthyridine-7-carboxylic acid* ***27***

**Figure S51.** 13C NMR spectrum (DMSO-*d6*, 100 MHz) of *benzo[g]benzo[4,5]imidazo[1,2-a][1,5]naphthyridine-7-carboxylic acid* ***27***

**Figure S52.** 1H NMR spectrum (DMSO-*d6*, 400 MHz) of *N-(3-N,N-(dimethylamino)propyl)benzo[g]benzo[4,5]imidazo[1,2-a][1,8]naphthyridine-6-carboxamide* **25**

**
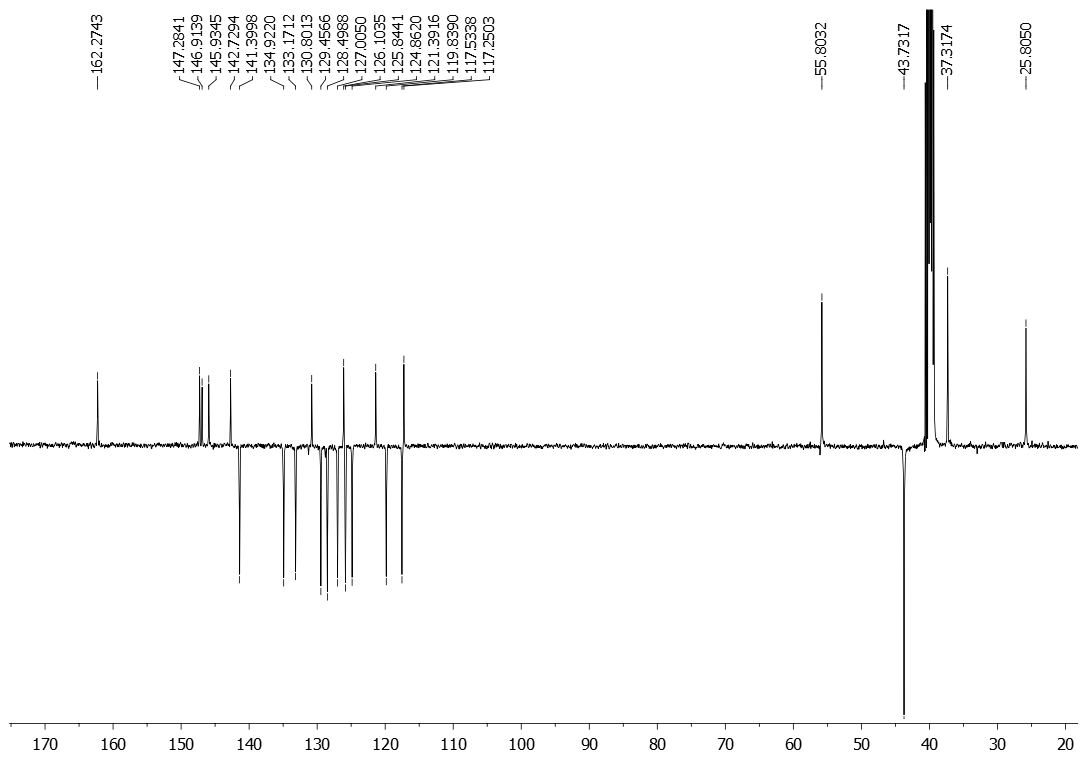
**

**Figure S53.** 13C NMR spectrum (DMSO-*d6*, 100 MHz) of *N-(3-N,N-(dimethylamino)propyl)benzo[g]benzo[4,5]imidazo[1,2-a][1,8]naphthyridine-6-carboxamide* **25**

**
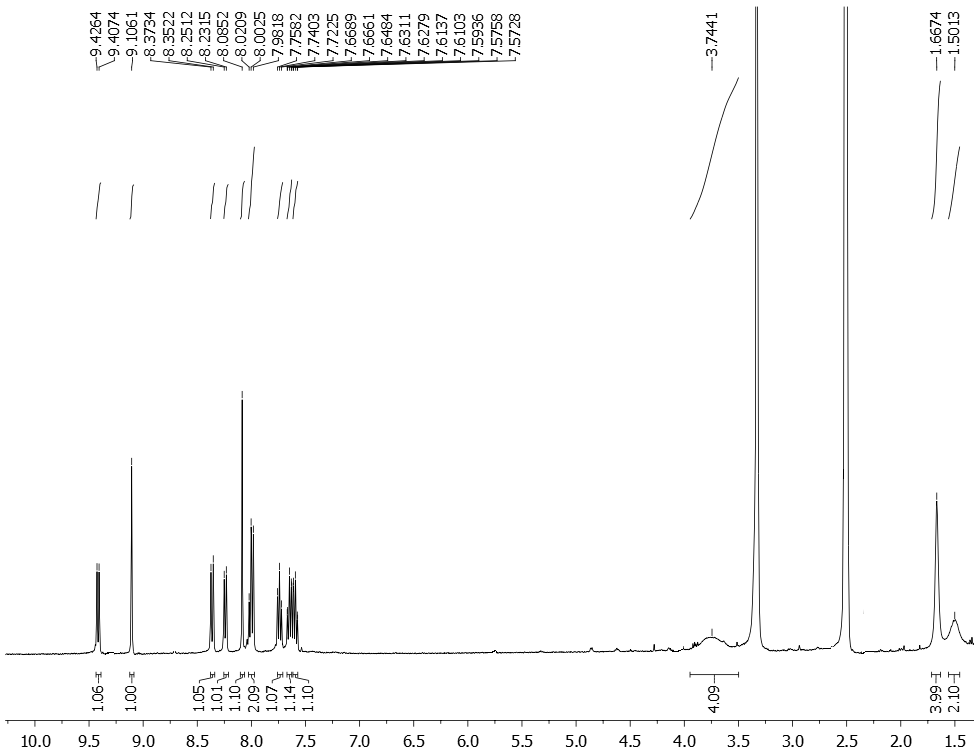
**

**Figure S54.** 1H NMR spectrum (DMSO-*d6*, 400 MHz) of *benzo[g]benzo[4,5]imidazo[1,2-a][1,8]naphthyridin-6-yl(piperidin-1-yl)methanone* **26**

**
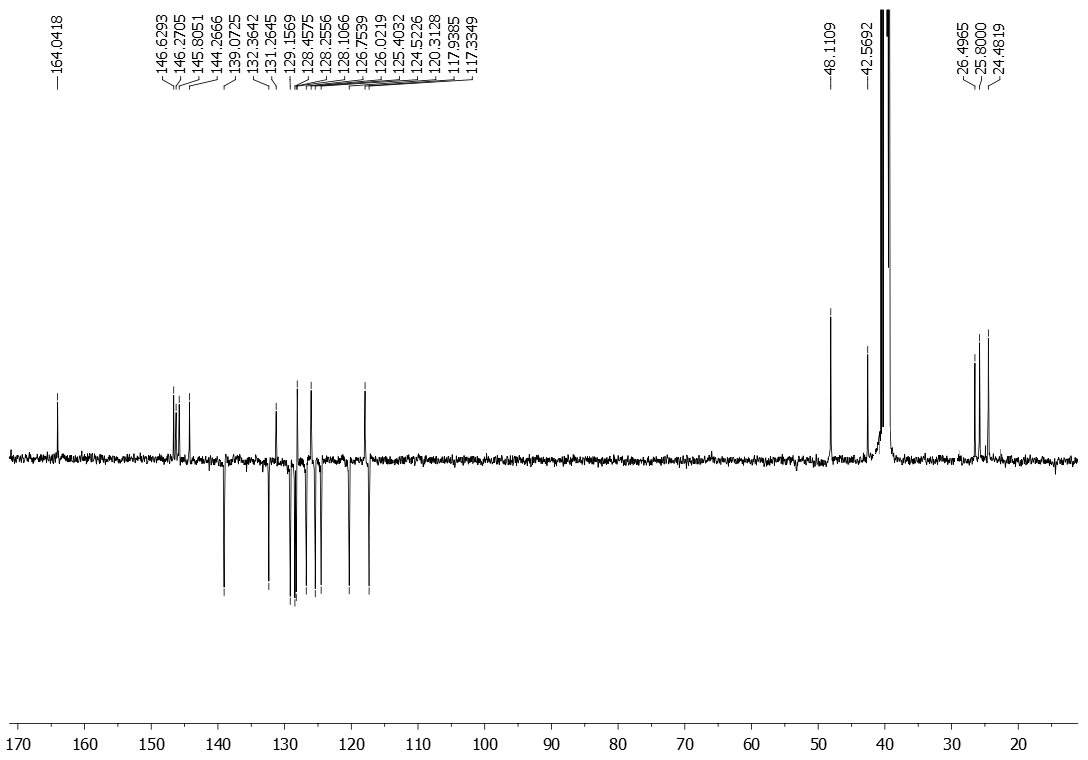
**

**Figure S55.** 13C NMR spectrum (DMSO-*d6*, 100 MHz) of *benzo[g]benzo[4,5]imidazo[1,2-a][1,8]naphthyridin-6-yl(piperidin-1-yl)methanone* **26**

**Figure S56.** 1H NMR spectrum (DMSO-*d6*, 400 MHz) of *N-isobutylbenzo[g]benzo[4,5]imidazo[1,2-a][1,5]naphthyridine-7-carboxamide* **29**

**
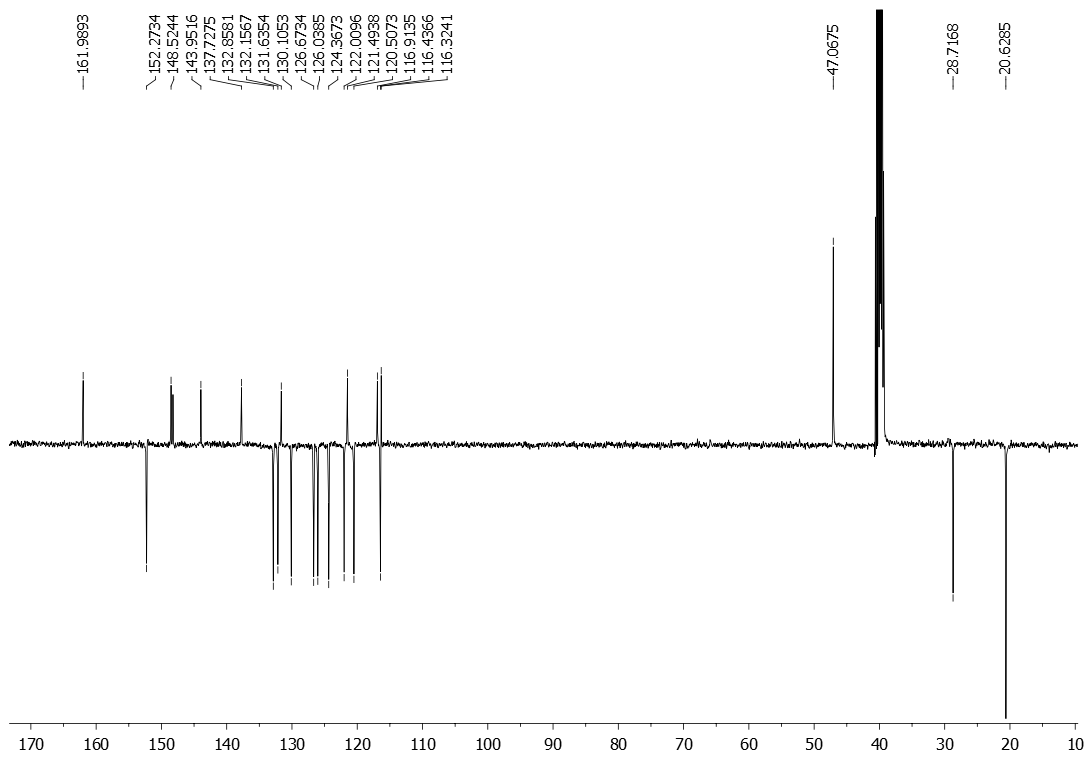
**

**Figure S57.** 13C NMR spectrum (DMSO-*d6*, 100 MHz) of *N-isobutylbenzo[g]benzo[4,5]imidazo[1,2-a][1,5]naphthyridine-7-carboxamide* **29**

**Figure S58.** 1H NMR spectrum (DMSO-*d6*, 400 MHz) of *N,N-dimethylbenzo[g]benzo[4,5]imidazo[1,2-a][1,5]naphthyridine-7-carboxamide* **30**

**
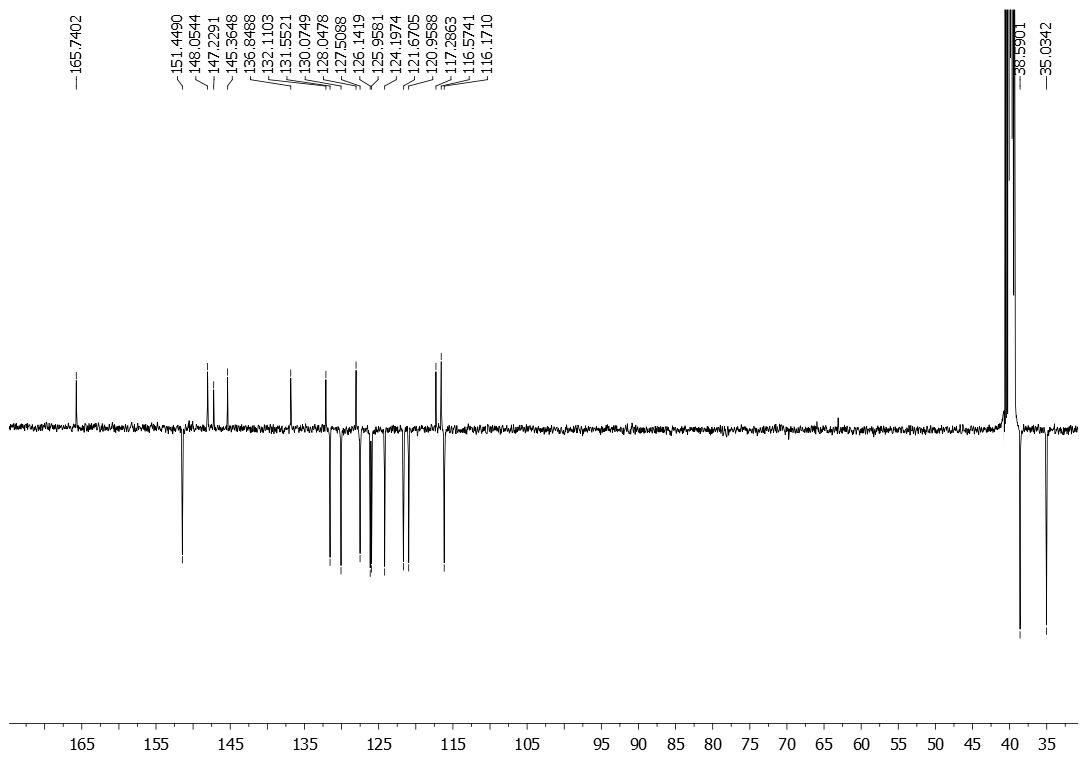
**

**Figure S59.** 13C NMR spectrum (DMSO-*d6*, 100 MHz) of *N,N-dimethylbenzo[g]benzo[4,5]imidazo[1,2-a][1,5]naphthyridine-7-carboxamide* **30**
